# Supplementary material for: Identification of PblB mediating galactose-specific adhesion in a successful Streptococcus pneumoniae clone
Source: PubMed Central journal article supplement (PMC4508584; doi:10.1038/srep12265), 2015-07-21
Supplement: srep12265-s1.pdf [file srep12265-s1.pdf]

**Identification of PblB mediating galactose-specific adhesion in  
a successful *Streptococcus pneumoniae* clone**

**Yu-Chia Hsieh<sup>1</sup>, Tzu-Lung Lin<sup>2</sup>, Che-Ming Lin<sup>1</sup>, Jin-Town Wang<sup>2,3,\*</sup>**

<sup>1</sup>*Department of Pediatrics, Chang Gung Children's Hospital, Chang Gung Memorial Hospital, Chang Gung University, College of Medicine, Taoyuan, Taiwan;*<sup>2</sup>*Departments of Microbiology, National Taiwan University College of Medicine, Taipei, Taiwan;*<sup>3</sup>*Departments of Internal Medicine, National Taiwan University Hospital, Taipei, Taiwan*

\*Corresponding author: Professor Jin-Town Wang

Department of Microbiology, National Taiwan University College of Medicine

No 1, Sec 1, Jen-Ai Rd, Taipei, Taiwan 10051

Tel: +886-2-2312-3456, ext.88292; Fax: +886-2-2394-8718

E-mail: [wangjt@ntu.edu.tw](mailto:wangjt@ntu.edu.tw)

**Key Words:** *Streptococcus pneumoniae*; microarray; phage; adhesin;  
galactose

**Running Title:** *pblB* of *Streptococcus pneumoniae*

# CLUSTAL 2.1 multiple sequence alignment

```
NTUH-P15      -----MAWFLAWYKTPKRALGDFSFNSDIQDRRTFNTTETETLYSVLLD 45
ST46-2        MMQRSITQMSVTSQSCGMALSRMVQNTKTALGDFSFNSDIQDRRTFNTTETETLYSVLLD 60
ST46-1        MMQRSITQMSVTSQSCGMALSRMVQNTKTALGDFSFNSDIQDRRTFNTTETETLYSVLLD 60
ST76-1        MMQRSITPVSVTSQSCGMALSRMVQNTKTALGDFSFNSDIQDRRTFNTTETETLYSILLD 60
ST76-2        MMQRSITPVSVTSQSCGMALSRMVQNTKTALGDFSFNSDIQDRRTFNTTETETLYSILLD 60
               . : :..* *****;***

NTUH-P15      GKHSIAGTWEGELVRDNFAMTVKKS RGENRGVVI TTHKNLKYQRTKNSQNVVTRIHARS 105
ST46-2        GKHSIAGTWEGELVRDNFAMTVKKS RGENRGVVI TTHKNLKYQRTKNSQNVVTRIHARS 120
ST46-1        GKHSIAGTWEGELVRDNFAMTVKKS RGENRGVVI TTHKNLKYQRTKNSQNVVTRIHARS 120
ST76-1        GKHSIVGTWEGELVRDNFAITVKKSRGENRGVVI TTHKNLKNYQRTKNSQNVVTRIHAKS 120
ST76-2        GKHSIVGTWEGELVRDNFAITVKKSRGENRGVVI TTHKNLKNYQRTKNSQNVVTRIHAKS 120
*****.*****;*****;*****;*

NTUH-P15      TFKPEGAEKETTIRVTVDSP LINSYPYINEKEYENNAKTVEELQKWAQSKFSNEGIDKV 165
ST46-2        TFKPEGAEKETTIRVTVDSP LINSYPYINEKEYENNAKTVEELQKWAQSKFSNEGIDKV 180
ST46-1        TFKPEGAEKETTIRVTVDSP LINSYPYINEKEYENNAKTVEELQKWAQSKFSNEGIDKV 180
ST76-1        TFKPEGAEKETTIRVTVDSP LINSYPYINEKEYENNAKTVEELQKWAQSKFSNEGIDKV 180
ST76-2        TFKPEGAEKETTIRVTVDSP LINSYPYINEKEYENNAKTVEELQKWAQSKFSNEGIDKV 180
*****

NTUH-P15      SDAIKIEAYELDGQVVHMGDTANLKS WKHNVDVFKKAIAYEFDALKEEYISLTFNDKAGI 225
ST46-2        SDAIKIEAYELDGQVVHMGDTANLKS WKHNVDVFKKAIAYEFDALKEEYISLTFNDKAGI 240
ST46-1        SDAIKIEAYELDGQVVHMGDTANLKS WKHNVDVFKKAIAYEFDALKEEYISLTFNDKAGI 240
ST76-1        SDAIKIEAYELDGQVVHMGDTVNLKSWKHNVDAFKKAIAYEFDALKEEYISLTFDDKAGI 240
ST76-2        SDAIKIEAYELDGQVVHMGDTVNLKSWKHNVDAFKKAIAYEFDALKEEYISLTFDDKAGI 240
*****.*****.*****;*****

NTUH-P15      GGSRASGGLSSAADAILGVTESAQEIALDKALQNADLDFDHKAGLLRQEISDGI ELAKAR 285
ST46-2        GGSRASGGLSSAADAILGVTESAQEIALDKALQNADLDFDHKAGLLRQEISDGI ELAKAR 300
ST46-1        GGSRASGGLSSAADAILGVTESAQEIALDKALQNADLDFDHKAGLLRQEISDGI ELAKAR 300
ST76-1        GGSRASGGLSSAADAILGVTESAQEIALEKALQNADLDFDHKAGLLRQEISDDI ELAKAK 300
ST76-2        GGSRASGGLSSAADAILGVTESAQEIALEKALQNADLDFDHKAGLLRQEISDDI ELAKAK 300
*****;*****.*****;

NTUH-P15      AEEVKRELSDTINQRFNSFDNGPLKETKRKAEEALRNAGASTLLAQEAKRIGLDSVARLE 345
ST46-2        AEEVKRELSDTINQRFNSFDNGPLKETKRKAEEALRNAGASTLLAQEAKRIGLDSVARLE 360
ST46-1        AEEVKRELSDTINQRFNSFDNGPLKETKRKAEEALRNAGASTLLAQEAKRIGLDSVARLE 360
ST76-1        AEEVKRELSDTINQRFNSFDNGPLKETKRKAEEALRNAGASSSLAQEAKRIGLDSVARLE 360
ST76-2        AEEVKRELSDTINQRFNSFDNGPLKETKRKAEEALRNAGASSSLAQEAKRIGLDSVARLE 360
*****;*****
```

NTUH-P15           AFKSQTTSAQATALSGDLLALKRTIANDIRPKQAQAEAEIAKQVEALSRTKNELAGASSLL 405  
 ST46-2           AFKSQTTSAQATALSGDLLALKRTIANDIRPKQAQAEAEIAKQVEALSRTKNELAGASSLL 420  
 ST46-1           AFKSQTTSAQATALSGDLLALKRTIANDIRPKQAQAEAEIAKQVEALSRTKNELAGASSLL 420  
 ST76-1           AFKSQTTSAQATALSGDLLALKRTIVNDIRPKQAQVEAEIAKQAEALSRTKNELAG----- 415  
 ST76-2           AFKSQTTSAQATALSGDLLALKRTIVNDIRPKQAQVEAEIAKQAEALSRTKNELAG----- 415  
 \*\*\*\*\*  
 NTUH-P15           AQEAKRIELDSVARLEAFKSQTTSAQATALS----- 435  
 ST46-2           AQEAKRIELDSVARLEAFKSQTTSAQATALSGDLLVLRKRTIANDIRPKQAQAEAEIAKQVE 480  
 ST46-1           AQEAKRIELDSVARLEAFKSQTTSAQATALS----- 450  
 ST76-1           -----  
 ST76-2           -----  
 NTUH-P15           -----GDLVLRKRTIANDI 449  
 ST46-2           ALSRTKNELAGASTLLAQEAKRIELDSVARLEAFKSQTTSAQATALSGDLLVLRKRTIANDI 540  
 ST46-1           -----GDLVLRKRTIANDI 464  
 ST76-1           -----  
 ST76-2           -----  
 NTUH-P15           RPKQAQAEAEIAKQVEVLSRTKNELAGVKSAQATYEETTTTRRLSELTNLANGKASKSELT 509  
 ST46-2           RPKQAQAEAEIAKQVEVLSRTKNELAGVKSAQATYEETTTTRRLSELTNLANGKTSKSELT 600  
 ST46-1           PP----- 466  
 ST76-1           -----  
 ST76-2           -----  
 NTUH-P15           QTAEELASRIASVQAGSSRNYFRNSRSRTFTTGGQAVYDYRTFIVPDFWKNSDRFKRDYV 569  
 ST46-2           QTAEELASRIASVQAGSSRNYFRNSRSRTFTTGGQAVYDYRTFIVPDFWKNSDRFKRDYV 660  
 ST46-1           -----NYFTNSRSRTFTTGGQAVYDYRTFIVPDFWKNSDRFKRDYV 507  
 ST76-1           -----  
 ST76-2           -----  
 NTUH-P15           RISFDVTFPVALVNDMPAMVHFSAPWYAYRNLIKGGTVERQHFEFTIDLSSSEDYQT 629  
 ST46-2           RISFDVTFPVALVNDMPAMVHFSAPWYAYRNLIKGGTVERQHFEFTIDLSSSEDYQT 720  
 ST46-1           RISFDVTFPVALVNDMPAMVHFSAPWYAYRNLIKGGTVERQHFEFTIDLSSSEDYQT 567  
 ST76-1           -----  
 ST76-2           -----  
 NTUH-P15           NNVFIRFGTNYGFPAGLQVVIENAMLSVGNYPAYQPAYEDQEDRVSVVESNFKQRADSL 689  
 ST46-2           NNVFIRFGTNYGFPAGLQVVIENAMLSVGNYPAYQPAYEDQEDRVSVVESNFKQRADSL 780  
 ST46-1           NNVFIRFGTNYGFPAGLQVVIENAMLSVGNYPAYQPAYEDQEDRVSVVESNFKQRADSL 627  
 ST76-1           -----  
 ST76-2           -----

NTUH-P15 DAGVSRLTEGLRTRKADISALNVTAENIRQSVKSLETDTONKLNQKLSQAEFEVRAGSIRQ 749  
ST46-2 DAGVSRLTEGLRTRKADISALNVTAENIRQSVKSLETDTONKLNQKLSQAEFEVRAGSIRQ 840  
ST46-1 DAGVSRLTEGLRTRKADISALNVTAENIRQSVKSLETDTONKLNQKLSQAEFEVRAGSIRQ 687  
ST76-1 -----VKSAQATYKETTTRRLS----- 432  
ST76-2 -----VKSAQATYKETTTRRLS----- 432

\*\*\* :: ::. .::\*\*

NTUH-P15 EILNATKDKASKSELQTAEELASRIASVQASGRNLFNLSLFKQDIPKGTGIWTTSTYTAT 809  
ST46-2 EILNATKDKASKSELQTAEELASRIASVQASGRNLFNLSLFKQDIPKGTGIWTTSTYTAT 900  
ST46-1 EILNATKDKASKSELQTAEELASRIASVQASGRNLFNLSLFKQDIPKGTGIWTTSTYTAT 747  
ST76-1 ELTNLANGKASKSELQTAEELASRIASVQASGRNLFNLSLFKQDIPKGTGIWTTSTYTAT 492  
ST76-2 ELTNLANGKASKSELQTAEELASRIASVQASGRNLFNLSLFKQDIPKGTGIWTTSTYTAT 492

\*: \* ::.\*\*\*\*\*

NTUH-P15 IDSESKYLGHKALKI IGLNPSGRDGGNPKVTPALGQFGKVI PGSTTNQDVTISFYAKAN 869  
ST46-2 IDSESKYLGHKALKI IGLNPSGRDGGNPKVTPALGQFGKVI PGSTTNQDVTISFYAKAN 960  
ST46-1 IDSESKYLGHKALKI IGLNPSGRDGGNPKVTPALGQFGKVI PGSTTNQDVTISFYAKAN 807  
ST76-1 IDSESKYLGHKALKI IGLNPSGRDGGNPKVTPALGQFGKVI PGSTTNQDVTISFYAKAN 552  
ST76-2 IDSESKYLGHKALKI IGLNPSGRDGGNPKVTPALGQFGKVI PGSTTNQDVTISFYAKAN 552

\*\*\*\*\*

NTUH-P15 KNGIMLR SRLGNIGYKTGNVTLSTEIKRYVVH I PKGWTNESKQTTNEWLFNFNQEGTIWI 929  
ST46-2 KNGIMLR SRLGNIGYKTGNVTLSTEIKRYVVH I PKGWTNESKQTTNEWLFNFNFNQEGTIWI 1020  
ST46-1 KNGIMLR SRLGNIGYKTGNVTLSTEIKRYVVH I PKGWTNESKQTTNEWLFNFNFNQEGTIWI 867  
ST76-1 KNGIMLR SRLGNIGYKTGNVTLSTEIKRYVVH I PKGWTNESKQTTNEWLFNFNFNQEGTIWI 612  
ST76-2 KNGIMLR SRLGNIGYKTGNVTLSTEIKRYVVH I PKGWTNESKQTTNEWLFNFNFNQEGTIWI 612

\*\*\*\*\*

NTUH-P15 WMPKFEISDVDTSYSEAPEDIEGQISTVESNFKQRADSLEAGVSR LTEGLRTRKADISALN 989  
ST46-2 WMPKFEISDVDTSYSEAPEDIEGQISTVESNFKQRADSLEAGVSR LTEGLRTRKADISALN 1080  
ST46-1 WMPKFEISDVDTSYSEAPEDIEGQISTVESNFKQRADSLEAGVSR LTEGLRTRKADISALN 927  
ST76-1 WMPKFEISDVDTSYSEAPEDIEGQISTVESTFKQRADSLDAGVSR LTEGLRTRKADISSLN 672  
ST76-2 WMPKFEISDVDTSYSEAPEDIEGQISTVESTFKQRADSLDAGVSR LTEGLRTRKADISSLN 672

\*\*\*\*\*.\*\*\*\*\*:\*\*\* \*\*\*\*\*:\*\*\*

NTUH-P15 VTAENIRQSVKSLETDTONKLNQKLSQAEFEVRAGSIRQEILNVT KDKASKSELQTAE 1049  
ST46-2 VTAENIRQSVKSLETDTONKLNQKLSQAEFEVRAGSIRQEILNVT KDKASKSELQTAE 1140  
ST46-1 VTAENIRQSVKSLETDTONKLNQKLSQAEFEVRAGSIRQEILNVT KDKASKSELQTAE 987  
ST76-1 VTAENIRQSVKSLETDTONKLNQKLSQAEFEVRAGSIRQEILNAT KDKASKTELQTAE 732  
ST76-2 VTAENIRQSVKSLETDTONKLNQKLSQAEFEVRAGSIRQEILNAT KDKASKSELQTAE 732

\*\*\*\*\*.\*\*\*\*\*:\*\*\*\*\*

NTUH-P15 LSSKIASVQVGGINLLRNTASLLIGDRSK-GCWMSASGGNGRAISVEVLDPKKMIKNMI 1108

ST46-2 LSSKIASVQVGGINLLRNTASLLIGDRSK-GCWMSASGGNGRAISVEVLDPKKMIKNMI 1199

ST46-1 LSSKIASVQVGGINLLRNTASLLIGDRSK-GCWMSASGGNGRAISVEVLDPKKMIKNMI 1046

ST76-1 LSSKIASVQASGRNLFLN--SLFKQDISKTGIWTTST--YTAADSESKYLGHKALKIIG 788

ST76-2 LSSKIASVQASGRNLFLN--SLFKQDISKTGIWTTST--YTAADSESKYLGHKALKIIG 788

\*\*\*\*\*..\* \*\*: \* \*\*: \* \* \* \* \* ::: \*\*. \* :\* :\* :

NTUH-P15 RVIENTNGGNKDLTQLVRLRIGEKYTISCYARIASDSPNANVN---LLFRSWANNTDLNR 1165

ST46-2 RVIENTNGGNKDLTQLVRLRIGEKYTISCYARIASDSPNANVN---LLFRSWANNTDLNR 1256

ST46-1 RVIENTNGGNKDLTQLVRLRIGEKYTISCYARIASDSPNANVN---LLFRSWANNTDLNR 1103

ST76-1 LNPSGRDGGNPKVTPALGQFGKVI PGSTTNQDVTISFYAKANKNGIMLRSRLGNIGYKT 848

ST76-2 LNPSGRDGGNPKVTPALGQFGKVI PGSTTNQDVTISFYAKANKNGIMLRSRLGNIGYKT 848

.. :\*\*\* .:\* . :\*: . \* : .: \* \*:. \* :\*:\*\* .\* . :

NTUH-P15 -KFQKSISHKNWQKYS---FTFTADAIENSIQFGQSGAGIIEICAPKIESGLTLDYSEA 1221

ST46-2 -KFQKSISHKNWQKYS---FTFTADAIENSIQFGQSGAGIIEICAPKIESGLTLDYSEA 1312

ST46-1 -KFQKSISHKNWQKYS---FTFTADAIENSIQFGQSGAGIIEICAPKIESGLTLDYSEA 1159

ST76-1 GNVTLSTEIKRYVVHIPKGWTNESKQTTNEWLFNFNQEGTIWIWMPKFEISDVTDSYSEA 908

ST76-2 GNVTLSTEIKRYVVHIPKGWTNESKQTTNEWLFNFNQEGTIWIWMPKFEISDVTDSYSEA 908

:. \* . \*.: : :\* :. \* . \* . \* \* \* \*\*: \* . : \* .\*\*\*\*

NTUH-P15 PEDIEGQISTVESTFKQRANSLDAGVSRLEGLRTRKVDISALNVAENIRQSVKSLETDT 1281

ST46-2 PEDIEGQISTVESTFKQRANSLDAGVSRLEGLRTRKVDISALNVAENIRQSVKSLETDT 1372

ST46-1 PEDIEGQISTVESTFKQRANSLDAGVSRLEGLRTRKVDISALNVAENIRQSVKSLETDT 1219

ST76-1 PEDIEGQISTVESTFKQRANSLDAGVSRLEGLRTRKADISSLNVAENIRQSVKSLETDT 968

ST76-2 PEDIEGQISTVESTFKQRANSLDAGVSRLEGLRTRKADISSLNVAENIRQSVKSLETDT 968

\*\*\*\*\*:\*\*\*\*\*.\*\*\*:\*\*\*\*\*

NTUH-P15 QNKLNQKLSQAEFEVRAGSIRQEILNATKDKADKTLVVSEAGKLRREEFSKMKVGGRNLIWI 1341

ST46-2 QNKLNQKLSQAEFEVRAGSIRQEILNATKDKADKTLVVSEAGKLRREEFSKMKVGGRNLIWI 1432

ST46-1 QNKLNQKLSQAEFEVRAGSIRQEILNATKDKADKTLVVSEAGKLRREEFSKMKVGGRNLIWI 1279

ST76-1 QNKLNQKLSQAEFEVRAGSIRQEILNATKDKADKTLVVAEAGKLRREEFSKMKVGGRNLIWI 1028

ST76-2 QNKLNQKLSQAEFEVRAGSIRQEILNATKDKADKTLVVAEAGKLRREEFSKMKVGGRNLIWI 1028

\*\*\*\*\*:\*\*\*\*\*

NTUH-P15 KSKTVGAVIEKLPENHVTGQKECYRLENNSTLTFNLEPDFSSRLYQKVTFSAWIKYENVV 1401

ST46-2 KSKTVGAVIEKLPENHVTGQKECYRLENNSTLTFNLEPDFSSRLYQKVTFSAWIKYENVV 1492

ST46-1 KSKTVGAVIEKLPENHVTGQKECYRLENNSTLTFNLEPDFSSRLYQKVTFSAWIKYENVV 1339

ST76-1 KSKTVGAVIEKLPENHVTGQKECYRLENNSTLTFNLEPDFSSRLYQKVTFSAWIKYENVV 1088

ST76-2 KSKTVGAVIEKLPENHVTGQKECYRLENNSTLTFNLEPDFSSRLYQKVTFSAWIKYENVV 1088

\*\*\*\*\*

NTUH-P15 QGRNFWNVFNCFKHYLFRKNSETGVQSGPDYATLGMKGSADWKYITFTYDYSEKTNFDQ 1461  
ST46-2 QGRNFWNVFNCFKHYLFRKNSETGVQSGPDYATLGMKGSADWKYITFTYDYSEKTNFDQ 1552  
ST46-1 QGRNFWNVFNCFKHYLFRKNSETGVQSGPDYATLGMKGSADWKYITFTYDYSEKTNFDQ 1399  
ST76-1 QGRNFWNVFNCFKHYLFRKNSETGVQSGPDYATLGMKGSADWKYITFTYDYSEKTNFDQ 1148  
ST76-2 QGRNFWNVFNCFKHYLFRKNSETGVQSGPDYATLGMKGSADWKYITFTYDYSEKTNFDQ 1148

\*\*\*\*\*

NTUH-P15 LKTSLRFNLEGATSGTAWVTGIKVEIGSVATDWSAPEDADGLITEAKATFERTAQGLRT 1521  
ST46-2 LKTSLRFNLEGATSGTAWVTGIKVEIGSVATDWSAPEDADGLITEAKATFERTAQGLRT 1612  
ST46-1 LKTSLRFNLEGATSGTAWVTGIKVEIGSVATDWSAPEDADGLITEAKATFERTAQGLRT 1459  
ST76-1 LKTSLRFNLEGATSGTAWVTGIKVEIGSVATDWSAPEDADGLITEAKATFERTAQGLRT 1208  
ST76-2 LKTSLRFNLEGATSGTAWVTGIKVEIGSVATDWSAPEDADGLITEAKATFERTAQGLRT 1208

\*\*\*\*\*

NTUH-P15 DLSAIQEYVNKNGQRQEALQRYTREESARQATAVRELVNRDFVGKATYQEDVKGINQRIE 1581  
ST46-2 DLSAIQEYVNKNGQRQEALQRYTREESARQATAVRELVNRDFVGKATYQEDVKGINQRIE 1672  
ST46-1 DLSAIQEYVNKNGQRQEALQRYTREESARQATAVRELVNRDFVGKATYQEDVKGINQRIE 1519  
ST76-1 DLSAIQEYVNKNGQRQEALQRYTREESTRQATAVRELVNRDFVGKATYQEDVKGINQRIE 1268  
ST76-2 DLSAIQEYVNKNGQRQEALQRYTREESTRQATAVRELVNRDFVGKATYQEDVKGINQRIE 1268

\*\*\*\*\*:\*\*\*\*\*:\*\*\*\*\*

NTUH-P15 AVKTSANKDIASQIASYRQSVDGKFTDISSQITTYKQDVGGQISGLSNRLTSSEQGTQQ 1641  
ST46-2 AVKTSANKDIASQIASYRQSVDGKFTDISSQITTYKQDVGGQISGLSNRLTSSEQGTQQ 1732  
ST46-1 AVKTSANKDIASQIASYRQSVDGKFTDISSQITTYKQDVGGQISGLSNRLTSSEQGTQQ 1579  
ST76-1 AVKTSANKDIASQIASYRQSVDGKFTDISSQITTYKQDVGGQISGLSNRLTSSEQGTQQ 1328  
ST76-2 AVKTSANKDIASQIASYRQSVDGKFTDISSQITTYKQDVGGQISGLSNRLTSSEQGTQQ 1328

\*\*\*\*\*

NTUH-P15 ISNISNRINSNKQGTNDQISNLKTQVATNKDNAERQMGRISDQVSANKANADSQFANVTN 1701  
ST46-2 ISNISNRINSNKQGTNDQISNLKTQVATNKDNAERQMGRISDQVSANKANADSQFANVTN 1792  
ST46-1 ISNISNRINSNKQGTNDQISNLKTQVATNKDNAERQMGRISDQVSANKANADSQFANVTN 1639  
ST76-1 ISNLSNRINSNKQGTNDQISNLKTQVATNKDNAERQMGRISDQVSANKANADSQFVNVN 1388  
ST76-2 ISNLSNRINSNKQGTNDQISNLKTQVATNKDNAERQMGRISDQVSANKANADSQFVNVN 1388

\*\*\*:\*\*\*\*\*:\*\*\*\*

NTUH-P15 QLARKVETTEFQRVKETSCLYERILGNTENGIADKQVARMALTNQLFQVEVAKNASNGQNL 1761  
ST46-2 QLARKVETTEFQRVKETSCLYERILGNTENGIADKQVARMALTNQLFQVEVAKNASNGQNL 1852  
ST46-1 QLARKVETTEFQRVKETSCLYERILGNTENGIADKQVARMALTNQLFQVEVAKNASNGQNL 1699  
ST76-1 QLARKVETTEFQRVKETSCLYERILGNTENGIADKQVARMALTNQLFQVEVKGYSVSGPNL 1448  
ST76-2 QLARKVETTEFQRVKETSCLYERILGNTENGIADKQVARMALTNQLFQVEVKGYSVSGPNL 1448

\*\*\*\*\*:\*\*\*\*\*.\* : .\* \*\*

|          |                                                                 |      |
|----------|-----------------------------------------------------------------|------|
| NTUH-P15 | LKGTKDFSGGWKNKGANWKKHAEKYKGVDFLTKNNSWNGVGQEIDAKIGEYVTFSLWMKS    | 1821 |
| ST46-2   | LKGTKDFSGGWKNKGANWKKHAEKYKGVDFLTKNNSWNGVGQEIDAKIGEYVTFSLWMKS    | 1912 |
| ST46-1   | LKGTKDFSGGWKNKGANWKKHAEKYKGVDFLTKNNSWNGVGQEIDAKIGEYVTFSLWMKS    | 1759 |
| ST76-1   | IK-----NSDFKNATNEWGSTQNLGRLVKHSFYHNGQKDLMRLSNATKKNENFLYSHRFNL   | 1503 |
| ST76-2   | IK-----NSDFKNATNEWGSTQNLGRLVKHSFYHNGQKDLMRLSNATKKNENFLYSHRFNL   | 1503 |
|          | :* . . . : ** : * . : : * . * : * . : : : : * . . * : : * : : * |      |
| NTUH-P15 | DWKNDTAN-----FYVNRNGSVEKGGWVPSETS---VAITSEWKRYSTFTF             | 1863 |
| ST46-2   | DWKNDTVN-----FYVNRNGSVEKGGWVPSETS---VAITSEWKRYSTFTF             | 1954 |
| ST46-1   | DWKNDTVN-----FYVNRNGSVEKGGWVPSETS---VAITSEWKRYSTFTF             | 1801 |
| ST76-1   | ERNTDYVLNFRGFNNSALASYDVYILGRRAGESDGFTIVKKVVS SKKLLTSRCEDEVSVTF  | 1563 |
| ST76-2   | ERNTDYVLNFRGFNNSALASYDVYILGRRAGESDGFTIVKKVVS SKKLLTSRCEDEVSVTF  | 1563 |
|          | : : . * . : : . * . . . . * : : : . . ** . : * . **             |      |
| NTUH-P15 | KITVDGFIFPRVERLNQN---TNLYIAGLKLEKGSYATPYTEAPEDTD-----EAIRS      | 1913 |
| ST46-2   | KITVDGFIFPRVERLNQN---TNLYIAGLKLEKGSYATPYTEAPEDTD-----EAIRS      | 2004 |
| ST46-1   | KITVDGFIFPRVERLNQN---TNLYIAGLKLEKGSYATPYTEAPEDTD-----EAIRS      | 1851 |
| ST76-1   | NSGEMDNAYIRFDNNGSSSGTADLYITEVDLYKGYKPRTWQPHPEDVVADANKKLEATQT    | 1623 |
| ST76-2   | NSGEMDNAYIRFDNNGSSSGTADLYITEVDLYKGYKPRTWQPHPEDVVADANKKLEATQT    | 1623 |
|          | : . : * . : . . . : : * * : : * * . . : : * * . * * : :         |      |
| NTUH-P15 | VQSQLTGSWAVQNINSAGDIISGINLGANGHNRFVGLKTHITGETLIDRAVIKSAMVDKL    | 1973 |
| ST46-2   | VQSQLTGSWAVQNINSAGDIISGINLGANGHNRFVGLKTHITGETLIDRAVIKSAMVDKL    | 2064 |
| ST46-1   | VQSQLTGSWAVQNINSAGDIISGINLGANGHNRFVGLKTHITGETLIDRAVIKSAMVDKL    | 1911 |
| ST76-1   | KMTLLTGSWAVQNINSAGDIISGINLGANGHNRFVGLKTHITGETLIDRAVIKSAMVDKL    | 1683 |
| ST76-2   | KMTLLTGSWAVQNINSAGDIISGINLGANGHNRFVGLKTHITGETLIDRAVIKSAMVDKL    | 1683 |
|          | : *****                                                         |      |
| NTUH-P15 | KTA-----ILKLVRSRLRY-----                                        | 1987 |
| ST46-2   | KTANFEAGSVTTTILDAEAVTAEKLVKNALIRKLTATDAF-----                   | 2105 |
| ST46-1   | KTANFEAGSVTTTILDAEAVTAEKLVKNALIRKLTATDAFIDQLISKT                | 1960 |
| ST76-1   | KTGNFEAGSVTTTILDAEAVTAEKLVKNALIRKLTANDAFI-----                  | 1725 |
| ST76-2   | KTGNFEAGSVTTTILDAEAVTAEKLVKNALIRKLTANDAFI-----                  | 1725 |
|          | ** . ** : . : : *                                               |      |

**Supplementary Figure S1.** Comparison of amino acid sequences of PblB in NTUH-P15, serotype 14 ST46-1, serotype 14 ST46-2, serotype 6B ST76-1 and serotype 6B ST76-2. Gray shaded area indicted predicted galactose-binding domain-like region.
